# Supplementary figures and images for: The conjugation of Cu/Zn superoxide dismutase (SOD) to O-(2-hydroxyl) propyl-3-trimethyl ammonium chitosan chloride (O-HTCC) enhances its therapeutic potential against radiation-induced oxidative damage
Source: Royal Society of Chemistry journal article supplement (doi:10.1039/c5py02025e), 2016-01-01

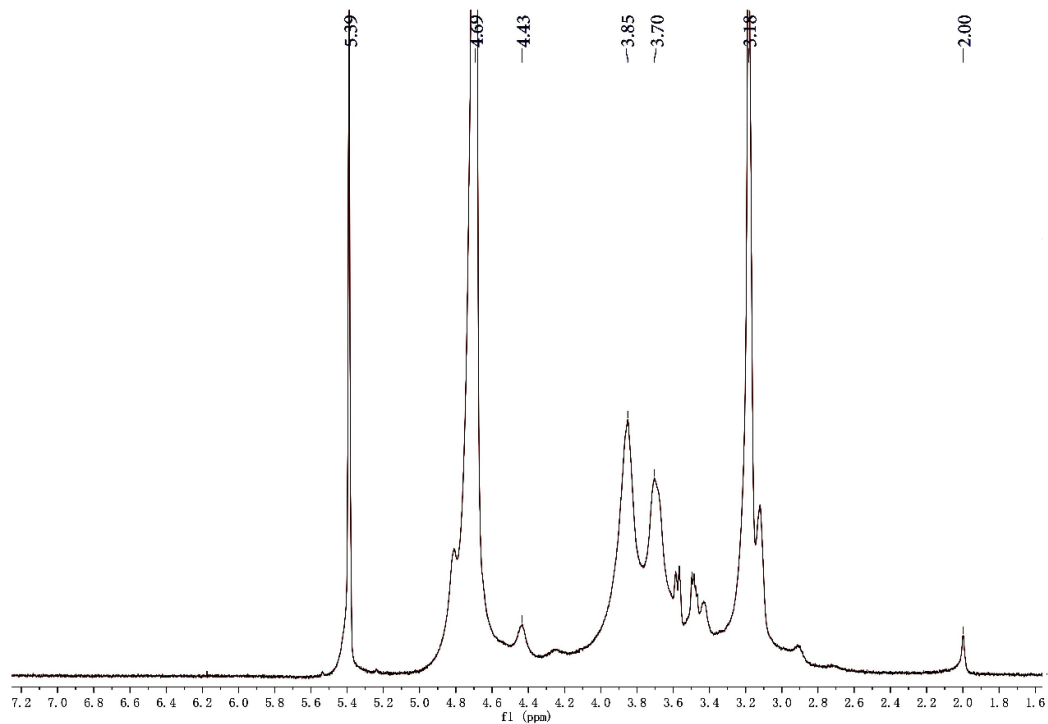

Fig. S1  $^1\text{H}$  NMR spectrum of O-HTCC

Supplement: c5py02025e1.pdf [file c5py02025e1.pdf]

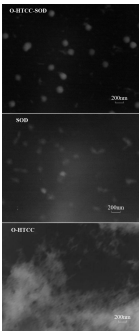

Fig. S2 Transmission electron microscopy (TEM) images of D-HTCC-800, 800 and O-HTCC

Supplement: c5py02025e2.pdf [file c5py02025e2.pdf]
